# Supplementary material for: Drug Repurposing and High-throughput screening against Phosphomannomutase for the treatment of Cutaneous Leishmaniasis
Source: Research Square preprint supplement (doi:10.21203/rs.3.rs-1283812/v1), 2022-04-26
Supplement: Supplementary file 1 [file 214d643c0545dff4da9c469e.docx]

**Parasite life cycle**

**
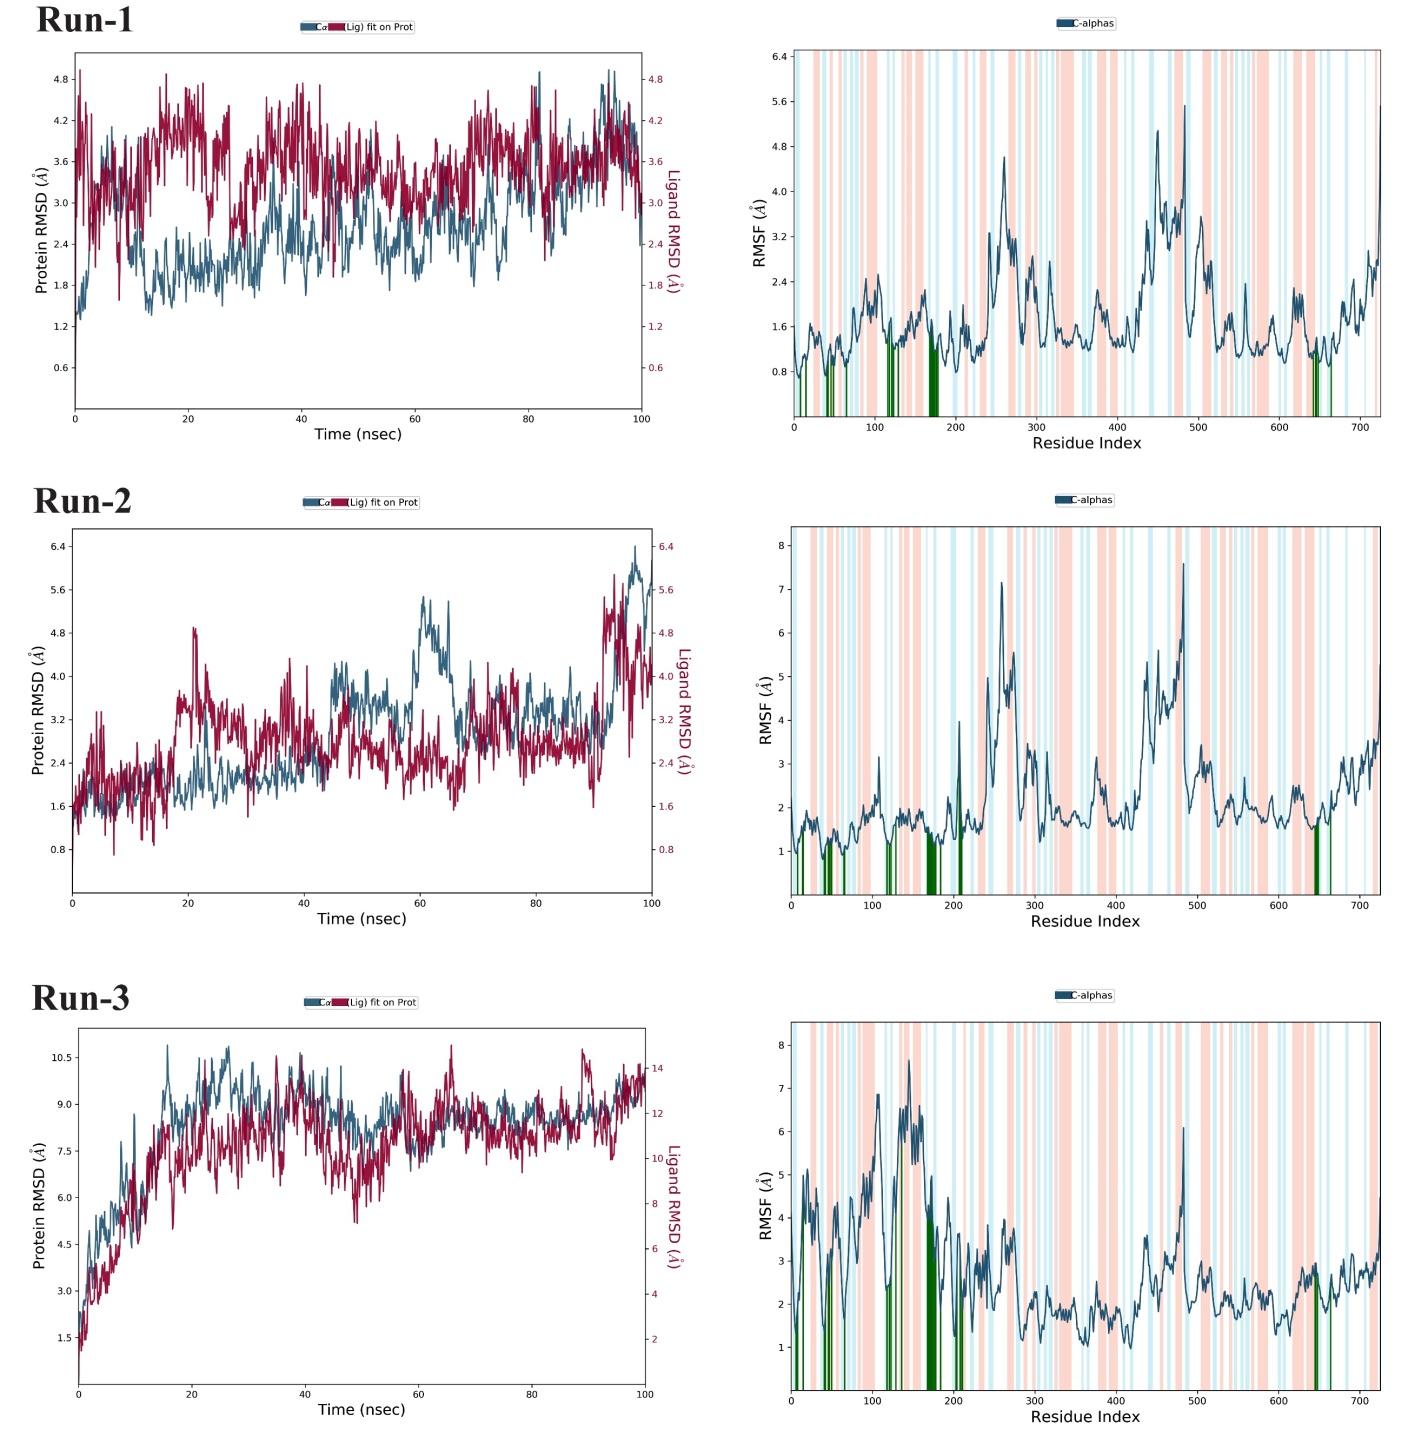
**

**Figure A1.** Triplicate RMSD and RMSF of 2I54-ZINC000026664090 complex for 100ns MD simulation

**
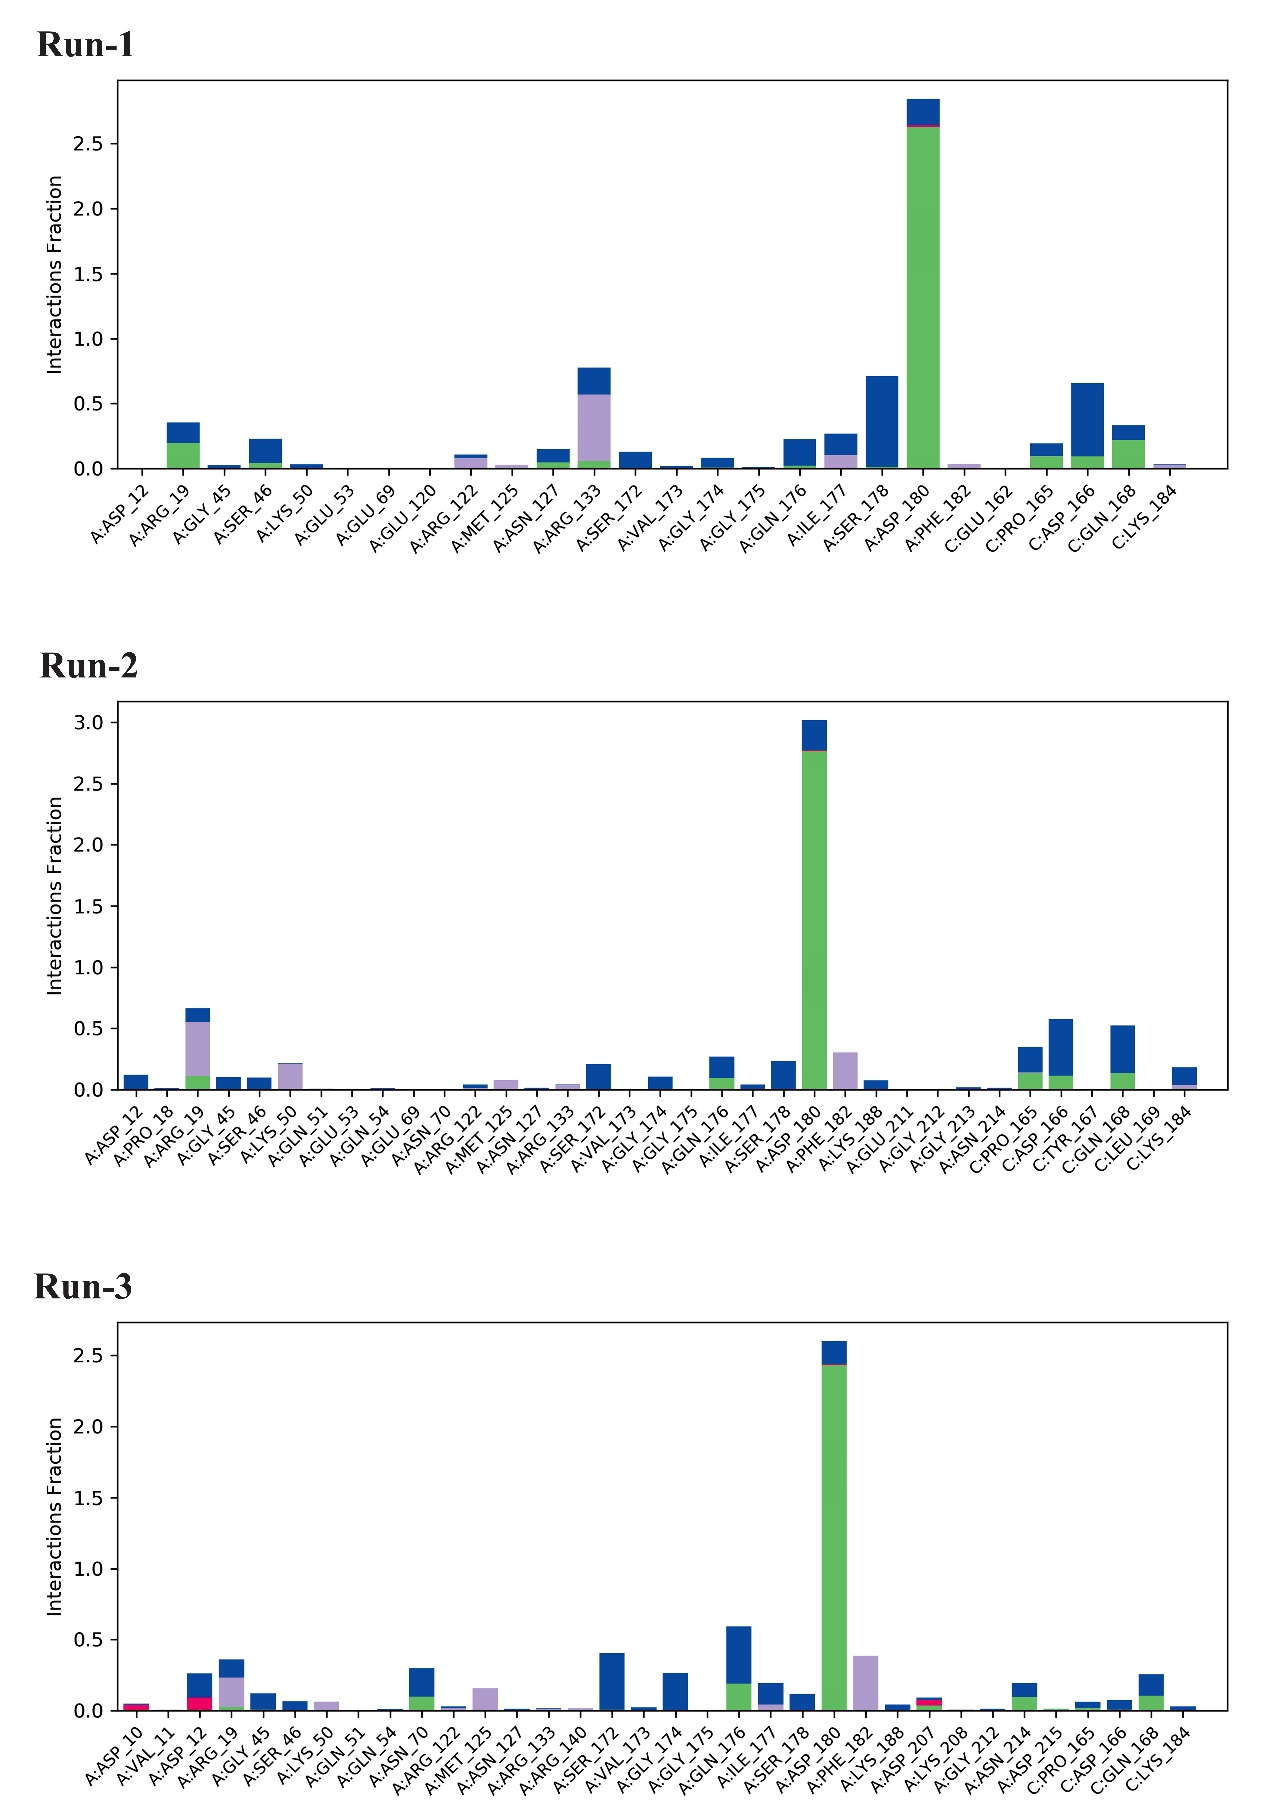
**

**Figure A2.** Ligand interactions with residues in 2I54-ZINC000026664090 complex for 100ns MD simulation


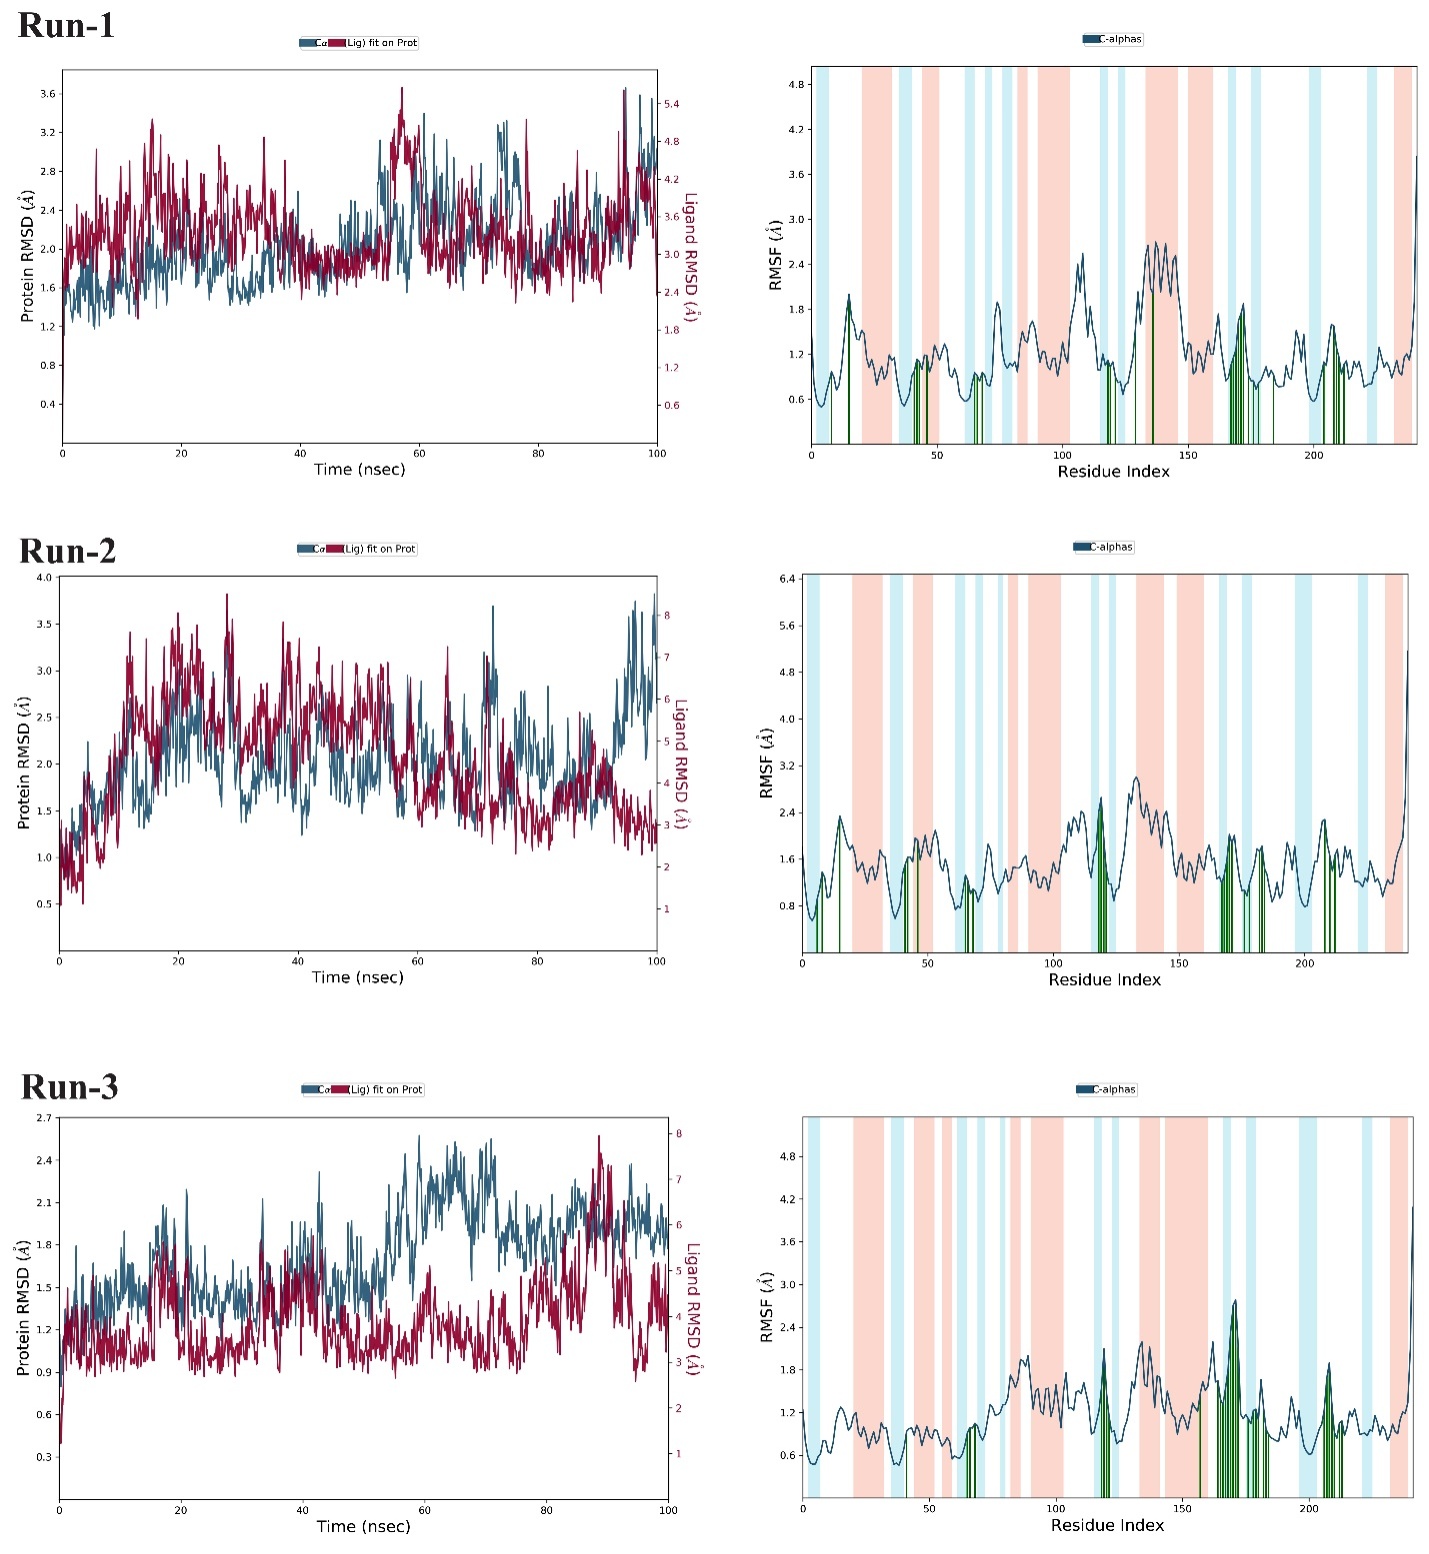


**Figure B1.** Triplicate RMSD and RMSF of 2I54-Grazoprevir complex for 100ns MD simulation


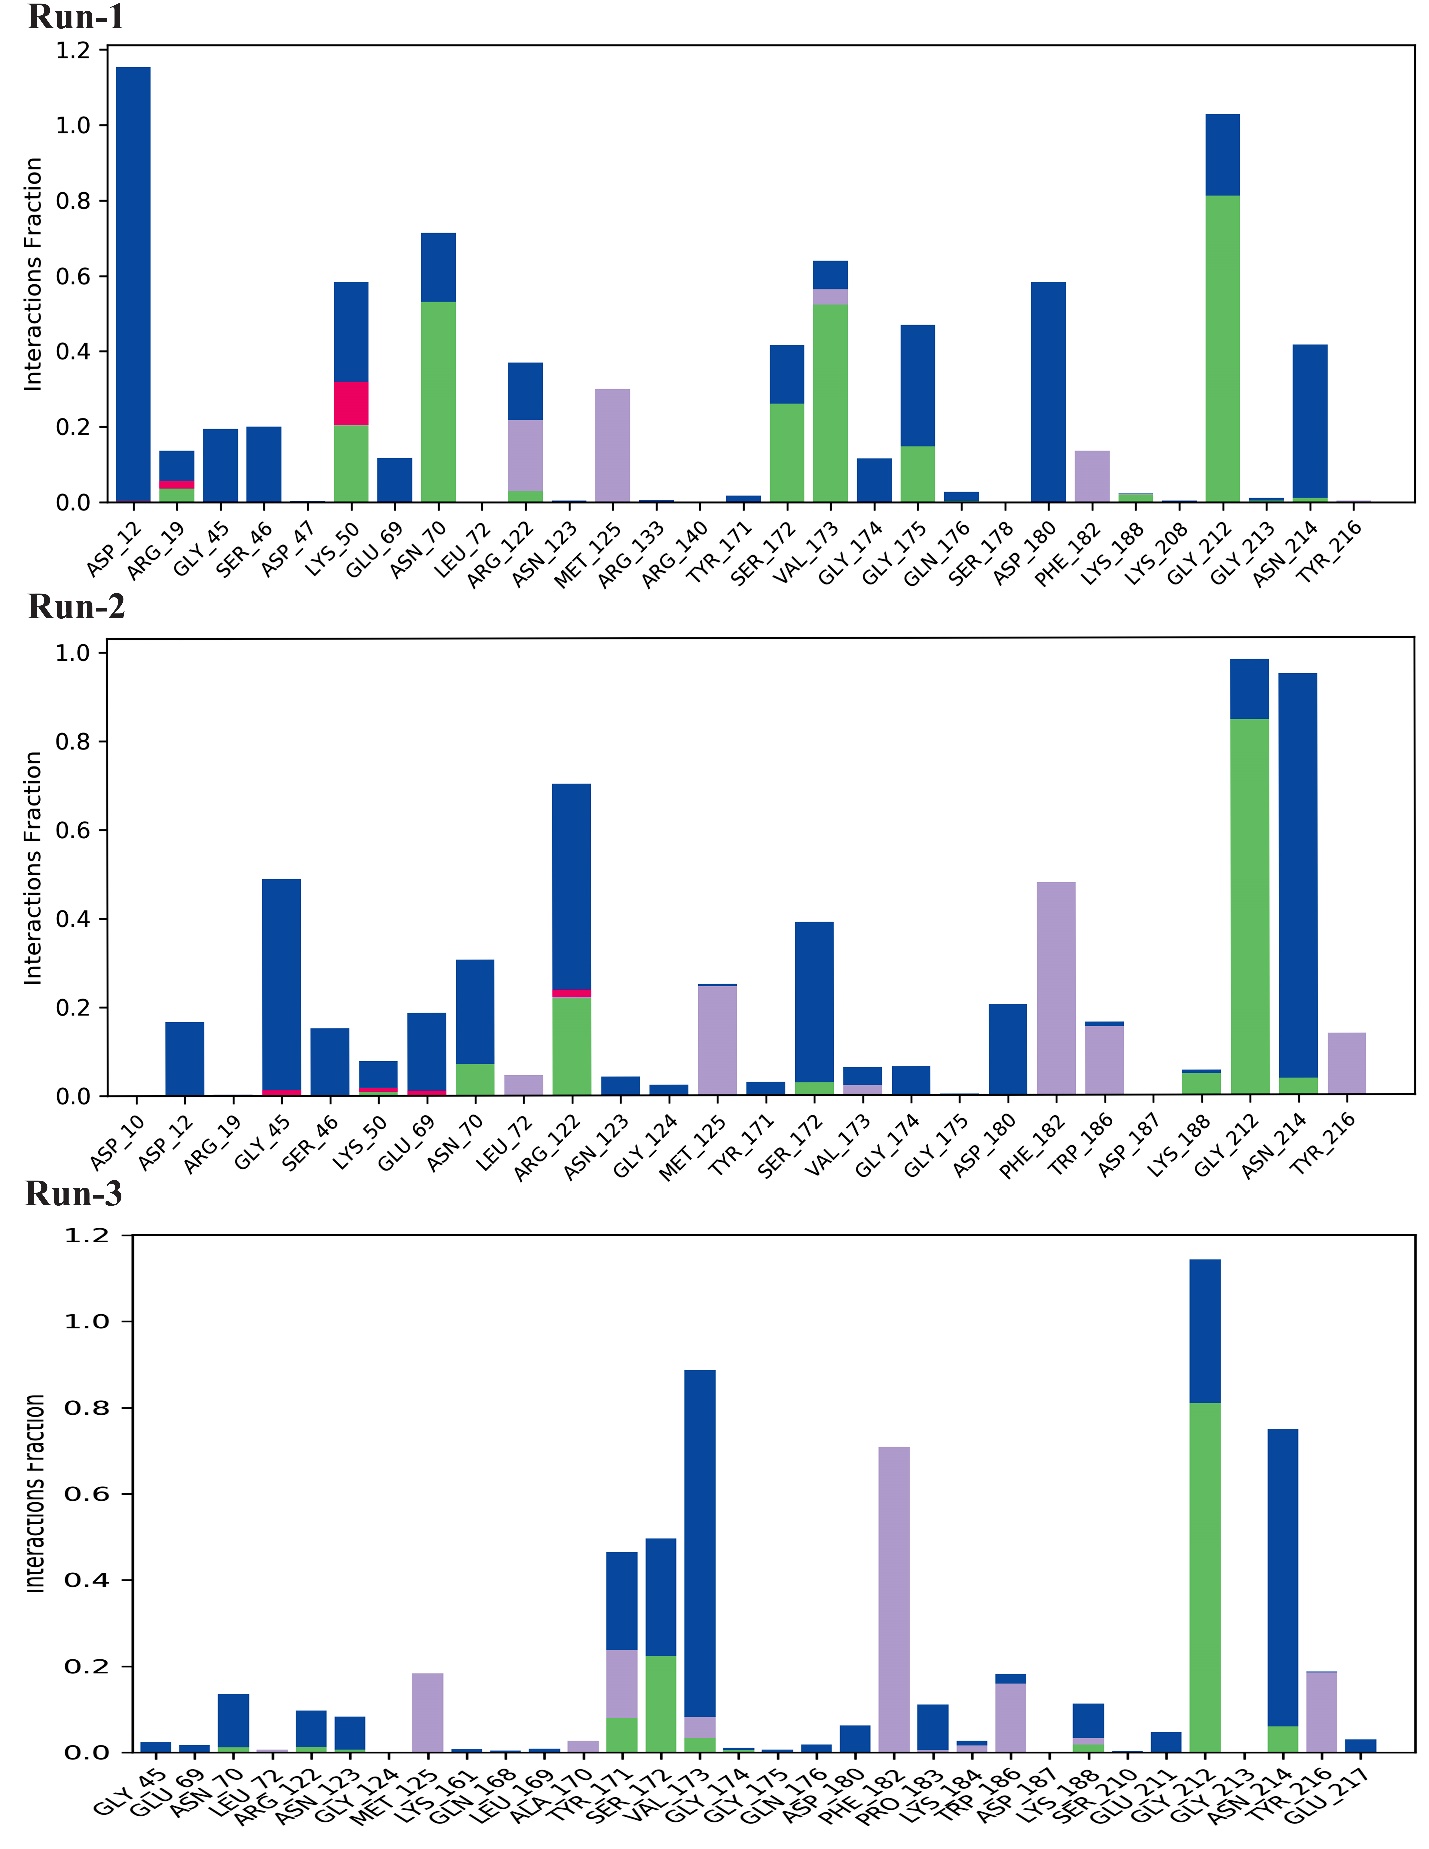


**Figure B2.** Ligand interactions with residues in 2I54-Grazoprevir complex for 100ns MD simulation

**Mannose Pathway:**
