# Supplementary material for: Drug Repurposing and High-throughput screening against Phosphomannomutase for the treatment of Cutaneous Leishmaniasis
Source: Research Square preprint supplement (doi:10.21203/rs.3.rs-1283812/v1), 2022-04-26
Supplement: Supplementary file 2 [file 6dc2194a7b1d414aa34dcd44.docx]

**Table 1. Molecular docking simulation results through Schrodinger**

| **S.No.** | Compound name/ Zinc Id | | PyRx Binding Energy | Schrodinger | | | Common uses |
| --- | --- | --- | --- | --- | --- | --- | --- |
| Docking Score | Glide gscore | Glide emodel |
|  | Saquinavir  [ZINC26664090](https://zinc.docking.org/substances/ZINC000026664090/) | | -8.9 | -10.144 | **-10.158** | **-120.006** | HIV/AIDS |
|  | Grazoprevir  [ZINC95551509](https://zinc.docking.org/substances/ZINC000095551509/) | | -8.5 | -10.131 | **-10.137** | **-120.225** | Hepatitis C |
|  | Glecaprevir  [ZINC164528615](https://zinc.docking.org/substances/ZINC000164528615/) | | -9.0 | -9.755 | -9.758 | -120.135 | hepatitis C |
|  | Olysio  [ZINC164760756](https://zinc.docking.org/substances/ZINC000164760756/) | | -8.6 | -9.704 | -9.71 | -96.478 | Hepatitis C |
|  | Methyltetrahydrofolate  [ZINC2005305](https://zinc.docking.org/substances/ZINC000002005305/) | | -8.0 | -9.425 | -9.441 | -104.453 | Anemia |
|  | Isavuconazonium  [ZINC49637509](https://zinc.docking.org/substances/ZINC000049637509/) | -8.1 | | -8.868 | -9.372 | -117.313 | Fungal infections |
|  | Ceftarolinefosamil anhydrous base[ZINC96006023](https://zinc.docking.org/substances/ZINC000096006023/) | -8.0 | | -8.841 | -9.143 | -134.132 | Antibiotic |
|  | Valstar  [ZINC28232750](https://zinc.docking.org/substances/ZINC000028232750/) | -8.7 | | -8.809 | -8.81 | -100.86 | High blood pressure and heart failure |
|  | Capastat  [ZINC150338698](https://zinc.docking.org/substances/ZINC000150338698/) | -8.3 | | -8.761 | -9.273 | -109.597 | Tuberculosis (TB) |
|  | Bromocriptine  [ZINC53683151](https://zinc.docking.org/substances/ZINC000053683151/) | -8.6 | | -8.66 | -8.839 | -92.616 | [Parkinson’s disease](https://www.healthline.com/health/parkinsons/stages) |
|  | Naldemedine  [ZINC100378061](https://zinc.docking.org/substances/ZINC000100378061/) | -9.0 | | -8.545 | -8.938 | -97.355 | Constipation |
|  | Accolate  [ZINC896717](https://zinc.docking.org/substances/ZINC000000896717/) | -8.4 | | -8.499 | -8.506 | -108.308 | Asthma |
|  | Sqv  [ZINC26985532](https://zinc.docking.org/substances/ZINC000026985532/) | -9.1 | | -8.483 | -8.496 | -102.175 | HIV |
|  | Edoxaban  [ZINC43200832](https://zinc.docking.org/substances/ZINC000043200832/) | -8.2 | | -8.335 | -8.566 | -90.036 | Strokes or blood clots |
|  | Brigatinib  [ZINC148723177](https://zinc.docking.org/substances/ZINC000148723177/) | -8.5 | | -8.283 | -8.296 | -87.1 | lung cancer |
|  | Olaparib  [ZINC40430143](https://zinc.docking.org/substances/ZINC000040430143/) | -8.1 | | -7.97 | -7.97 | -79.842 | Cancer |
|  | Demeclocycline  [ZINC100036924](https://zinc.docking.org/substances/ZINC000100036924/) | -8.0 | | -7.858 | -8.054 | -70.308 | Bacterial infections respiratory tract infections, infections of the skin |
|  | Maraviroc  [ZINC100003902](https://zinc.docking.org/substances/ZINC000100003902/) | -8.2 | | -7.723 | -7.723 | -78.609 | Human immunodeficiency virus (HIV) |
|  | Emend  [ZINC27428713](https://zinc.docking.org/substances/ZINC000027428713/) | -8.6 | | -7.451 | -7.451 | -69.365 | Nausea and vomiting |
|  | Daclatasvir[ZINC68204830](https://zinc.docking.org/substances/ZINC000068204830/) | -8.6 | | -7.355 | -8.608 | -95.033 | Chronic-hepatitis C, infection of the liver |
|  | Doxazosin  [ZINC94566092](https://zinc.docking.org/substances/ZINC000094566092/) | -8.0 | | -7.208 | -7.338 | -64.468 | High blood pressure |
|  | Amaryl  [ZINC537791](https://zinc.docking.org/substances/ZINC000000537791/) | -8.0 | | -7.087 | -7.11 | -86.168 | Diabetes high blood sugar |
|  | Glimepirid  [ZINC100070954](https://zinc.docking.org/substances/ZINC000100070954/) | -8.7 | | -7.084 | -7.108 | -85.984 | Type 2 diabetes mellitus (T2DM) to improve glycemic control |
|  | Flibanserin  [ZINC52716421](https://zinc.docking.org/substances/ZINC000052716421/) | -8.2 | | -7.064 | -7.075 | -60.438 | HSDD |
|  | Noxafil  [ZINC28639340](https://zinc.docking.org/substances/ZINC000028639340/) | -8.0 | | -6.943 | -6.961 | -72.33 | Hematopoietic stem cell transplant |
|  | Cabozantinib  [ZINC70466416](https://zinc.docking.org/substances/ZINC000070466416/) | -8.2 | | -6.797 | -8.347 | -94.422 | Cancer, hepatocellular carcinoma liver cancer |
|  | Tipranavir[ZINC100016058](https://zinc.docking.org/substances/ZINC000100016058/) | -8.0 | | -6.711 | -6.849 | -75.598 | Acquired immunodeficiency syndrome (AIDS) |
|  | Aptivus  [ZINC100022637](https://zinc.docking.org/substances/ZINC000100022637/) | -8.5 | | -6.706 | -6.844 | -75.575 | HIV/AIDS |
|  | Abemaciclib  [ZINC72318121](https://zinc.docking.org/substances/ZINC000072318121/) | -8.0 | | -6.667 | -7.485 | -83.038 | Breast cancer |
|  | Sorafenib  [ZINC1493878](https://zinc.docking.org/substances/ZINC000001493878/) | -8.1 | | -6.647 | -6.659 | -67.537 | Kidney, liver, and thyroid cancer |
|  | Cobimetinib  [ZINC60325170](https://zinc.docking.org/substances/ZINC000060325170/) | -8.3 | | -6.414 | -6.416 | -60.058 | Skin cancer (melanoma) |
|  | Lumacaftor  [ZINC64033452](https://zinc.docking.org/substances/ZINC000064033452/) | -8.3 | | -6.413 | -6.413 | -79.4 | Reduce the risk of lung infections |
|  | Suvorexant  [ZINC49036447](https://zinc.docking.org/substances/ZINC000049036447/) | -8.9 | | -6.28 | -6.28 | -60.096 | Insomnia |
|  | Zelboraf  [ZINC52509366](https://zinc.docking.org/substances/ZINC000052509366/) | -8.0 | | -6.11 | -6.489 | -68.725 | Skin cancer |
|  | Dabrafenib  [ZINC68153186](https://zinc.docking.org/substances/ZINC000068153186/) | -8.2 | | -6.041 | -6.457 | -61.879 | Skin cancer |
|  | Nebivolol  [ZINC607986](https://zinc.docking.org/substances/ZINC000000607986/) | -8.1 | | -5.819 | -7.843 | -83.448 | Beta blocker, high blood pressure and heart failure |
|  | Lapatinib  [ZINC1550477](https://zinc.docking.org/substances/ZINC000001550477/) | -8.2 | | -5.23 | -6.398 | -82.687 | Breast cancer |
|  | Lifitegrast  [ZINC84668739](https://zinc.docking.org/substances/ZINC000084668739/) | -8.3 | | -5.097 | -5.097 | -75.912 | Dry eye disease |
|  | Ergotamine  [ZINC52955754](https://zinc.docking.org/substances/ZINC000052955754/) | -9.3 | | -5.087 | -7.426 | -85.025 | Migraine headaches |
|  | Lomitapide  [ZINC27990463](https://zinc.docking.org/substances/ZINC000027990463/) | -9.5 | | -4.984 | -4.987 | -54.714 | Familial hypercholesterolemia |
|  | Niraparib  [ZINC43206370](https://zinc.docking.org/substances/ZINC000043206370/) | -8.0 | | -4.935 | -4.935 | -51.749 | Peritoneal cancer |
|  | Azelastine  [ZINC897240](https://zinc.docking.org/substances/ZINC000000897240/) | -8.1 | | -4.199 | -4.2 | -49.306 | Allergy symptoms |
|  | Visudyne  [ZINC150338699](https://zinc.docking.org/substances/ZINC000150338699/) | -8.0 | | -4.165 | -4.166 | -60.702 | Eye conditions |
|  | Telotristat  [ZINC84758235](https://zinc.docking.org/substances/ZINC000084758235/) | -8.1 | | -4.141 | -4.167 | -62.629 | Diarrhea caused by carcinoid tumors |
|  | Ceritinib  [ZINC96272772](https://zinc.docking.org/substances/ZINC000096272772/) | -8.1 | | -3.78 | -3.78 | -57.205 | Non-small cell lung cancer |
|  | Irinotecan  [ZINC1612996](https://zinc.docking.org/substances/ZINC000001612996/) | -8.7 | | -3.026 | -3.028 | -50.8 | Cancer |
|  | Amphotericin B | -9.3 | | -6.199 | -7.485 | -83.038 | Anti- leishmanial |
|  | Miltefosine | -5.5 | | -5.734 | -5.734 | -59.354 | Anti- leishmanial |
